# Supplementary material for: Development of the breastfeeding support scale to measure breastfeeding support from lay and professional persons, and its predictive validity in Japan
Source: PeerJ journal article supplement (doi:10.7717/peerj.11779), 2021-07-27
Supplement: Data_breastfeeding_support.xlsx [file Data_breastfeeding_support.xlsx]

## Sheet: ALL 243
cent	ID	age	c_order	age_baby	gw	bw	mode	anes	BFH	adm_baby	congeni	contra	sts_1	sts_2	ond_1	ond_2	expbf	intention	partner	edu	finance	country	tbc_1	tbc_2	ptbc	work	fapgar_1	fapgar_2	fapgar_3	fapgar_4	fapgar_5	bf	other_1	other_med	other_wa	other_te	other_jui	other_cf	other_o	ifh	hist_f	hist_o_1	hist_med	hist_wa	hist_te	hist_jui	hist_cf	hist_o	rsn_1
s	3	28	1	3	39	2	2	2	3	2	2	2	2	2	1	1	2	1	2	4	1	1	1	9	2	5	1	1	1	1	1	1	2	9	9	9	9	9	9	2	1	2	9	9	9	9	9	9	0
k	6	33	1	4	39	2	2	2	3	2	2	2	1	2	1	2	2	1	2	3	2	1	1	9	2	5	1	1	1	1	1	2	2	9	9	9	9	9	9	2	1	1	0	0	1	0	0	0	0
s	7	36	3	3	40	2	2	2	3	2	2	2	1	2	1	1	1	1	2	4	4	1	1	9	2	6	1	1	1	1	1	1	2	9	9	9	9	9	9	2	1	2	9	9	9	9	9	9	0
k	8	33	2	4	38	2	1	9	3	2	2	2	2	2	1	1	2	1	2	4	3	1	1	9	1	1	2	1	1	1	1	3	2	9	9	9	9	9	9	2	1	1	1	0	0	0	0	0	0
k	9	35	2	3	40	2	2	2	3	2	2	2	2	2	2	1	1	1	2	3	2	1	1	9	2	6	2	2	2	2	1	1	2	9	9	9	9	9	9	2	1	1	1	0	0	0	0	0	0
s	12	34	2	3	40	2	2	2	3	2	2	2	2	1	1	1	1	1	2	3	3	1	1	9	2	6	1	1	1	1	1	1	2	9	9	9	9	9	9	2	2	2	9	9	9	9	9	9	9
k	14	35	3	4	40	2	2	2	3	2	2	2	1	2	1	1	1	1	2	4	3	1	1	9	2	6	1	2	1	1	2	1	1	0	0	0	0	1	0	2	2	1	1	0	0	0	1	0	9
k	15	37	2	4	40	2	2	2	3	2	2	2	1	2	1	1	1	1	2	4	2	1	1	9	2	6	1	1	1	1	1	1	2	9	9	9	9	9	9	2	1	1	0	1	0	0	0	0	0
k	16	26	1	3	38	2	2	2	3	2	2	2	1	1	1	1	1	1	2	3	3	1	1	9	2	5	1	1	1	2	2	2	2	9	9	9	9	9	9	2	1	1	0	1	0	0	0	0	0
k	17	33	1	4	39	2	2	2	3	2	2	2	2	2	1	1	2	1	2	3	2	1	1	9	2	6	2	2	2	2	2	2	2	9	9	9	9	9	9	2	1	1	0	1	1	0	0	0	0
k	27	27	1	4	38	2	2	2	3	2	2	2	1	1	1	1	2	1	2	2	4	1	1	9	1	6	1	1	2	2	1	1	2	9	9	9	9	9	9	2	1	1	1	0	0	0	0	0	0
s	28	31	3	3	40	2	2	2	3	2	2	2	1	2	1	1	1	1	2	2	3	1	1	9	1	5	1	2	2	2	2	1	1	0	0	1	0	0	0	2	1	1	1	1	1	0	0	0	0
s	30	37	1	3	39	2	2	1	3	2	2	2	1	2	2	2	2	1	2	4	1	1	1	9	2	6	1	1	1	1	1	1	99	99	99	99	99	99	99	2	1	2	9	9	9	9	9	9	0
k	37	23	1	4	39	2	2	2	3	2	2	2	1	1	1	1	2	1	2	1	2	1	2	3	1	5	1	2	2	2	1	1	2	9	9	9	9	9	9	1	1	1	0	0	1	0	0	0	0
k	38	20	1	3	38	2	1	9	3	2	2	2	2	2	1	1	2	1	2	2	3	1	1	9	1	5	1	1	1	1	1	1	2	9	9	9	9	9	9	2	1	1	1	0	1	0	0	0	0
s	42	36	1	4	38	2	1	9	3	2	2	2	2	2	2	1	2	1	2	4	3	1	2	3	2	6	1	2	1	1	2	1	2	9	9	9	9	9	9	2	1	2	9	9	9	9	9	9	0
s	43	34	1	3	40	2	2	2	3	2	2	2	1	2	1	1	2	1	2	4	1	1	2	3	2	6	1	1	1	1	1	1	2	9	9	9	9	9	9	2	1	2	9	9	9	9	9	9	0
s	46	25	1	3	40	2	2	2	3	2	2	2	1	2	2	2	2	1	2	3	2	1	1	9	2	5	1	1	1	1	1	1	2	9	9	9	9	9	9	2	1	1	0	0	0	1	0	0	0
s	50	39	2	3	38	2	1	9	1	2	2	2	2	2	1	1	1	1	2	3	3	1	1	9	2	5	1	1	1	2	2	1	2	9	9	9	9	9	9	2	1	2	9	9	9	9	9	9	0
k	52	35	1	4	40	2	1	9	3	2	2	2	2	2	2	2	2	1	2	4	2	1	1	9	2	5	1	1	1	2	1	3	2	9	9	9	9	9	9	2	1	1	0	1	0	0	0	1	0
c	57	35	2	3	40	2	2	2	3	2	2	2	1	2	1	1	1	1	2	2	3	1	1	9	2	5	2	1	1	2	1	1	1	1	0	0	0	0	0	2	1	1	1	0	0	0	0	0	0
k	61	28	2	3	40	2	2	1	3	2	2	2	1	1	1	1	1	1	2	4	4	1	1	9	2	2	1	1	1	1	1	1	2	9	9	9	9	9	9	2	2	2	9	9	9	9	9	9	9
t	62	35	3	4	39	2	2	2	3	2	2	2	1	2	1	1	1	1	2	2	3	1	1	9	2	5	1	1	1	2	1	1	2	9	9	9	9	9	9	2	2	2	9	9	9	9	9	9	9
t	66	33	1	4	40	2	1	9	3	2	2	2	2	2	1	1	2	1	2	3	2	1	1	9	2	6	1	1	1	1	1	1	2	9	9	9	9	9	9	2	1	1	0	0	1	0	0	0	0
c	67	34	2	3	39	2	2	2	3	2	2	2	1	2	1	2	1	1	2	3	2	1	2	3	2	6	2	2	2	2	2	1	2	9	9	9	9	9	9	2	2	2	9	9	9	9	9	9	0
c	72	29	1	4	40	2	2	2	3	2	2	2	1	2	1	1	2	1	2	3	3	1	1	9	2	5	1	1	1	1	1	1	2	9	9	9	9	9	9	2	1	1	0	1	0	0	0	0	0
t	74	26	1	4	41	2	1	9	3	2	2	2	2	2	1	2	2	1	2	4	2	1	2	3	1	5	1	1	2	1	1	1	2	9	9	9	9	9	9	2	1	2	9	9	9	9	9	9	0
t	77	29	2	4	38	2	2	2	3	2	2	2	1	2	1	1	1	1	2	4	1	1	1	9	1	6	1	2	1	2	1	1	2	9	9	9	9	9	9	2	1	2	9	9	9	9	9	9	0
t	82	35	1	4	40	2	2	2	3	2	2	2	1	1	1	1	2	1	2	4	2	1	1	9	2	6	1	1	1	2	1	3	2	9	9	9	9	9	9	2	1	2	9	9	9	9	9	9	0
t	84	21	1	4	39	2	2	2	3	2	2	2	1	2	1	2	1	1	2	3	1	1	99	99	1	6	2	2	2	1	1	1	2	0	0	1	0	0	0	2	1	1	0	0	1	0	0	0	0
c	86	33	2	4	38	2	2	2	3	2	2	2	1	1	1	1	2	1	1	2	4	1	1	9	2	5	2	2	3	3	3	1	2	9	9	9	9	9	9	1	1	1	0	0	1	0	0	0	0
t	87	31	1	4	41	2	1	9	3	2	2	2	2	2	1	1	2	1	2	4	2	1	1	9	2	2	2	2	1	2	2	1	2	9	9	9	9	9	9	2	1	2	9	9	9	9	9	9	0
c	88	37	2	4	38	2	2	2	3	2	2	2	1	2	1	1	1	1	2	3	3	1	1	9	2	5	1	2	2	1	1	2	2	9	9	9	9	9	9	2	1	2	9	9	9	9	9	9	0
c	89	40	1	4	40	2	1	9	3	2	2	2	2	2	1	1	2	1	2	4	2	1	1	9	2	5	1	2	2	1	1	1	2	9	9	9	9	9	9	2	1	2	9	9	9	9	9	9	0
t	91	28	1	4	38	2	2	2	3	2	2	2	2	2	2	2	2	1	2	3	4	1	1	9	1	5	2	2	2	2	1	1	2	9	9	9	9	9	9	2	1	1	0	1	0	0	0	0	0
t	92	26	2	3	39	2	2	2	3	2	2	2	1	2	2	2	2	1	2	3	2	1	1	9	1	5	1	2	2	2	1	2	2	9	9	9	9	9	9	2	1	2	9	9	9	9	9	9	0
t	96	35	1	4	37	2	1	9	3	2	2	2	2	2	2	2	2	1	2	2	3	1	2	3	1	6	1	1	1	1	1	4	2	9	9	9	9	9	9	2	1	1	1	1	0	0	0	0	0
t	97	31	1	4	40	2	2	2	3	2	2	2	1	2	2	2	2	1	1	2	4	1	1	9	1	6	1	2	1	1	2	2	2	9	9	9	9	9	9	2	1	2	9	9	9	9	9	9	0
t	98	29	1	4	38	2	1	9	3	2	2	2	2	99	2	2	99	1	2	4	3	1	2	3	2	5	1	1	1	1	2	1	2	9	9	9	9	9	9	2	1	1	1	0	0	0	0	0	0
t	100	39	3	4	38	2	2	2	3	2	2	2	1	2	2	2	1	1	2	3	4	1	1	3	1	6	2	1	1	1	2	1	2	9	9	9	9	9	9	2	1	1	1	1	1	0	0	0	1
t	101	34	1	4	39	2	1	9	3	2	2	2	2	2	1	1	2	1	2	4	3	1	1	9	2	5	2	2	1	1	1	1	2	9	9	9	9	9	9	2	1	1	0	0	1	0	0	0	0
t	102	25	2	4	38	2	1	9	3	2	2	2	1	1	2	2	2	1	2	2	2	1	2	3	1	6	2	2	2	2	2	1	2	9	9	9	9	9	9	2	1	1	0	1	0	0	0	0	0
t	103	32	1	4	39	2	1	9	3	2	2	2	2	2	2	2	2	1	2	2	3	1	2	1	1	5	1	2	1	1	2	2	2	9	9	9	9	9	9	2	1	1	1	1	1	1	0	0	0
t	104	20	1	4	38	2	2	2	3	2	2	2	1	2	1	1	2	1	2	2	2	1	1	9	1	6	1	1	1	1	1	1	2	9	9	9	9	9	9	2	1	1	1	0	1	1	0	0	0
t	105	39	1	4	40	2	2	2	3	2	2	2	1	1	2	2	2	1	2	4	2	1	1	9	2	5	1	2	1	2	2	2	1	1	0	0	0	0	0	2	1	1	1	1	0	0	0	0	0
t	107	37	2	4	38	2	2	2	3	2	2	2	1	2	1	1	1	1	2	3	4	1	1	9	2	5	1	2	1	1	1	1	2	9	9	9	9	9	9	2	1	2	9	9	9	9	9	9	0
t	109	27	1	4	38	2	2	2	3	2	2	2	1	2	1	1	2	1	2	4	3	1	1	3	2	6	1	1	1	1	1	1	2	9	9	9	9	9	9	2	1	1	0	0	0	0	0	1	0
c	111	39	1	3	39	2	2	2	3	2	2	2	1	2	2	2	2	1	2	4	2	1	1	9	2	6	1	1	1	1	1	1	2	9	9	9	9	9	9	2	1	2	9	9	9	9	9	9	0
c	112	16	1	4	40	2	2	2	3	2	2	2	1	1	1	2	2	1	1	1	3	1	1	9	1	6	1	1	1	1	1	6	2	9	9	9	9	9	9	2	1	1	0	1	0	1	0	0	0
c	114	27	1	3	39	2	2	2	3	2	2	2	2	2	1	2	2	1	2	3	3	1	2	3	2	6	2	2	2	2	2	2	1	0	0	1	0	0	0	2	1	1	1	1	1	1	0	0	0
c	118	40	2	3	38	2	2	2	3	2	2	2	2	2	2	2	1	1	2	3	3	1	2	3	1	5	2	2	2	2	1	1	2	9	9	9	9	9	9	2	1	2	9	9	9	9	9	9	0
t	125	28	1	4	40	2	2	2	3	2	2	2	1	1	1	1	1	1	2	3	4	1	2	3	2	5	1	2	1	1	2	1	2	9	9	9	9	9	9	2	1	1	1	1	0	0	0	0	0
c	134	32	1	4	39	2	2	2	3	2	2	2	1	2	1	1	2	1	2	2	3	1	2	3	1	5	2	2	2	1	2	1	2	9	9	9	9	9	9	2	1	1	1	0	0	0	0	0	0
c	135	29	1	4	40	2	2	2	3	2	2	2	1	1	2	2	2	1	2	4	2	1	1	9	1	5	2	3	2	2	3	6	2	9	9	9	9	9	9	2	1	1	1	1	0	0	0	0	0
t	137	27	1	4	40	2	2	2	3	2	2	2	2	2	1	1	2	1	2	3	1	1	1	9	1	6	1	1	1	1	1	1	1	0	0	1	0	0	0	2	1	1	0	0	1	1	0	0	0
t	140	33	2	4	41	2	2	2	1	2	2	2	1	2	1	1	2	1	2	3	2	1	2	1	2	6	1	1	2	1	1	6	1	0	1	1	0	0	0	2	1	2	9	9	9	9	9	9	0
t	143	34	1	4	41	2	2	2	3	2	2	2	1	2	1	2	2	1	1	4	3	1	2	3	2	99	1	1	1	1	2	1	2	9	9	9	9	9	9	2	1	1	0	0	1	0	0	0	0
t	144	28	2	3	39	2	2	2	3	2	2	2	2	2	1	2	1	1	2	2	3	1	1	9	2	6	2	2	2	2	2	1	2	9	9	9	9	9	9	2	1	2	9	9	9	9	9	9	0
t	146	27	1	3	41	2	2	2	3	2	2	2	1	1	2	2	2	1	2	4	1	1	1	9	2	5	1	2	1	1	1	1	2	9	9	9	9	9	9	2	1	1	0	0	1	0	0	0	0
t	147	39	1	4	40	2	2	2	3	2	2	2	1	1	1	1	2	1	2	4	3	1	1	9	2	5	1	1	1	1	2	1	1	1	0	1	0	0	0	2	1	1	1	0	1	1	0	0	0
t	152	18	1	4	40	2	2	2	3	2	2	2	1	1	1	1	2	1	2	2	3	1	1	9	2	2	1	1	1	1	1	99	2	9	9	9	9	9	9	2	1	2	9	9	9	9	9	9	0
c	156	25	1	3	40	2	2	2	3	2	2	2	2	2	1	1	2	1	2	3	2	1	2	3	1	5	1	1	1	1	1	1	2	9	9	9	9	9	9	2	1	1	1	1	1	0	0	0	0
c	158	35	1	3	39	2	2	2	3	2	2	2	1	1	1	1	2	1	2	3	3	1	2	3	2	6	2	3	2	2	2	1	2	9	9	9	9	9	9	2	1	2	9	9	9	9	9	9	0
c	161	39	1	3	38	2	1	9	3	2	2	2	1	2	2	2	2	1	2	3	3	1	1	9	2	5	1	2	1	1	1	3	2	9	9	9	9	9	9	2	1	2	9	9	9	9	9	9	0
t	162	28	1	3	39	2	2	2	3	2	2	2	2	2	2	2	2	1	2	3	3	1	1	9	1	6	1	1	2	2	1	2	2	9	9	9	9	9	9	2	1	1	0	1	0	0	0	0	0
t	163	28	2	4	39	2	2	2	3	2	2	2	2	2	1	1	1	1	2	2	1	1	1	9	1	6	1	1	1	1	2	1	2	9	9	9	9	9	9	1	1	1	1	0	0	0	0	0	0
t	166	27	1	3	39	2	2	2	3	2	2	2	1	2	1	1	2	1	2	4	2	1	1	9	2	5	1	1	1	1	1	1	2	9	9	9	9	9	9	2	1	2	9	9	9	9	9	9	0
t	167	29	1	4	40	2	2	2	3	2	2	2	1	2	1	1	2	1	2	4	2	1	1	9	2	5	1	1	1	1	1	1	1	0	1	0	0	0	0	2	1	1	0	1	0	0	0	0	0
t	168	30	1	4	38	2	2	2	3	2	2	2	1	1	2	2	2	1	2	2	3	1	2	1	1	6	1	2	1	1	2	1	2	9	9	9	9	9	9	2	1	2	9	9	9	9	9	9	0
t	170	28	1	4	37	2	2	2	3	2	2	2	1	1	1	1	2	1	2	3	3	1	1	9	2	6	1	1	1	1	1	1	2	9	9	9	9	9	9	2	1	1	1	1	0	0	0	0	0
t	172	40	3	3	40	2	2	2	3	2	2	2	1	2	2	2	1	1	2	2	3	1	1	3	2	6	1	2	1	1	1	1	2	9	9	9	9	9	9	2	1	1	0	1	1	0	0	0	0
t	174	36	2	3	39	2	2	2	3	2	2	2	1	2	1	1	1	1	2	3	3	1	1	9	2	6	2	2	1	2	2	1	2	9	9	9	9	9	9	2	1	1	1	0	0	0	0	0	0
t	177	28	1	4	41	2	2	2	3	2	2	2	1	2	1	1	2	1	2	3	4	1	2	3	1	5	1	1	1	1	1	1	2	9	9	9	9	9	9	1	1	2	9	9	9	9	9	9	0
c	178	29	1	3	39	2	2	2	3	2	2	2	1	2	2	2	2	1	2	4	1	2	1	9	2	4	1	1	1	1	1	1	2	9	9	9	9	9	9	2	1	2	9	9	9	9	9	9	0
c	179	40	2	3	39	2	2	2	3	2	2	2	1	1	1	1	1	1	2	3	2	1	1	9	1	6	1	2	2	2	2	1	2	9	9	9	9	9	9	1	2	1	1	1	0	0	0	0	9
c	182	27	1	3	38	2	2	2	3	2	2	2	1	2	1	2	2	1	22	1	3	1	2	3	2	5	2	2	1	1	2	2	2	9	9	9	9	9	9	2	1	1	1	1	0	0	0	0	0
t	186	38	3	4	40	2	2	2	3	2	2	2	1	2	1	1	1	1	2	3	2	1	1	9	2	5	1	1	1	2	2	1	2	9	9	9	9	9	9	2	1	1	1	1	0	0	0	0	0
t	187	35	2	4	40	2	2	2	3	2	2	2	2	2	2	2	1	1	2	3	2	1	1	9	1	5	1	1	1	1	1	3	2	9	9	9	9	9	9	2	1	1	0	0	1	0	0	0	0
c	189	35	2	4	39	2	2	2	3	2	2	2	1	2	2	1	2	1	2	3	2	1	1	9	2	5	1	1	1	1	1	5	2	9	9	9	9	9	9	2	1	2	9	9	9	9	9	9	0
t	190	35	3	4	37	2	1	9	3	2	2	2	2	2	1	1	1	1	2	4	3	1	1	9	1	5	1	1	2	2	1	1	2	9	9	9	9	9	9	2	2	2	9	9	9	9	9	9	9
c	201	99	2	3	40	2	2	2	1	2	2	2	1	1	1	1	1	1	2	3	3	1	1	9	2	5	1	1	1	1	1	1	2	9	9	9	9	9	9	1	1	1	0	1	0	0	0	0	0
c	206	33	1	3	41	2	2	2	1	2	2	2	1	2	1	2	1	1	2	4	1	1	1	9	1	5	1	1	1	1	2	2	2	9	9	9	9	9	9	2	1	1	0	1	0	0	0	0	0
t	209	35	1	4	39	2	2	2	3	2	2	2	1	2	1	1	2	1	2	3	4	1	1	9	2	3	1	1	2	1	1	2	2	9	9	9	9	9	9	2	1	2	9	9	9	9	9	9	0
t	213	33	3	4	38	2	1	9	3	2	2	2	2	2	1	1	1	1	2	4	1	1	1	9	1	5	2	1	1	1	1	1	2	9	9	9	9	9	9	1	2	2	9	9	9	9	9	9	9
t	215	24	1	3	40	2	2	2	1	2	2	2	1	1	1	1	2	1	2	4	1	2	2	3	2	5	2	2	1	1	1	1	2	9	9	9	9	9	9	1	1	2	9	9	9	9	9	9	0
t	217	32	1	4	37	2	1	9	3	2	2	2	2	2	2	2	2	1	2	4	2	1	1	9	2	6	1	1	1	1	1	1	2	9	9	9	9	9	9	2	1	1	0	1	1	0	0	0	0
t	219	35	3	4	40	2	2	2	3	2	2	2	2	2	2	2	1	1	2	2	3	1	2	3	2	6	1	1	2	2	1	2	2	9	9	9	9	9	9	2	1	2	9	9	9	9	9	9	0
t	220	31	1	3	40	2	2	2	3	2	2	2	2	2	2	2	2	1	2	4	3	1	1	9	2	5	2	1	1	2	1	3	2	9	9	9	9	9	9	2	1	2	9	9	9	9	9	9	0
c	221	30	1	3	40	2	2	2	3	2	2	2	1	2	2	2	2	1	2	2	3	1	2	3	2	6	1	1	1	2	1	3	2	9	9	9	9	9	9	2	1	2	9	9	9	9	9	9	0
t	225	31	1	3	40	2	1	9	3	2	2	2	2	2	2	2	2	1	2	4	2	1	1	9	1	6	1	2	1	2	2	6	2	9	9	9	9	9	9	2	1	1	1	1	0	0	0	0	0
t	226	28	1	3	37	2	1	9	3	2	2	2	2	1	1	1	2	1	2	2	3	1	2	3	1	5	1	1	1	1	1	3	1	0	0	0	1	0	0	2	1	1	0	0	0	1	0	0	0
t	229	35	2	3	38	2	2	2	3	2	2	2	1	2	1	1	1	1	2	4	1	1	1	9	2	6	1	2	1	2	2	1	2	9	9	9	9	9	9	2	2	2	9	9	9	9	9	9	9
t	231	26	1	3	41	2	1	9	3	2	2	2	2	2	1	2	2	1	2	1	2	1	2	3	1	6	1	1	1	1	1	1	2	9	9	9	9	9	9	2	1	2	9	9	9	9	9	9	0
s	235	32	2	4	40	2	2	2	3	2	2	2	1	1	1	2	1	1	2	3	3	1	2	3	2	6	1	2	2	2	2	1	2	9	9	9	9	9	9	2	2	1	0	0	0	0	0	0	9
s	236	39	2	3	39	2	2	2	3	2	2	2	2	2	2	2	2	1	2	2	4	1	2	3	1	1	1	2	2	2	1	4	2	9	9	9	9	9	9	2	1	1	1	1	0	0	0	0	0
s	237	29	1	4	41	2	2	2	3	2	2	2	1	1	1	1	2	1	2	2	3	1	2	3	1	6	1	1	1	1	1	1	2	9	9	9	9	9	9	2	1	2	9	9	9	9	9	9	0
s	241	31	3	3	37	2	1	9	3	2	2	2	2	2	1	1	1	1	2	2	3	1	2	3	1	6	1	2	2	2	1	1	2	9	9	9	9	9	9	2	2	2	9	9	9	9	9	9	9
s	244	39	1	3	38	2	1	9	3	2	2	2	2	2	1	1	2	1	2	4	4	1	1	9	2	3	2	2	2	2	1	1	2	9	9	9	9	9	9	2	1	1	1	0	0	0	0	0	0
s	245	33	1	3	39	2	2	2	3	2	2	2	1	99	1	1	2	1	2	2	3	1	2	3	1	5	1	2	2	2	2	1	1	0	0	1	0	0	0	2	1	1	0	1	1	0	0	0	0
s	250	32	1	3	39	2	2	1	3	2	2	2	2	2	1	1	2	1	2	4	4	1	1	9	2	5	2	2	2	2	2	6	1	0	0	1	0	0	0	2	1	1	0	0	1	0	0	0	0
s	251	40	3	3	38	2	2	2	3	2	2	2	1	1	1	1	1	1	2	4	2	1	2	3	2	6	1	2	1	2	2	1	1	1	0	0	0	0	0	2	1	1	1	0	0	0	0	0	99
t	259	36	2	3	38	2	2	2	3	2	2	2	2	2	1	1	1	1	2	3	1	1	1	9	2	6	1	1	1	1	1	1	2	9	9	9	9	9	9	2	2	2	9	9	9	9	9	9	9
k	262	23	1	3	40	2	2	2	3	2	2	2	1	2	1	2	1	1	2	3	3	1	2	3	1	6	1	2	1	1	3	1	1	0	0	1	0	0	0	2	1	1	1	1	1	1	0	0	0
k	263	25	1	4	41	2	2	2	3	2	2	2	1	1	1	1	2	1	2	4	1	1	1	9	2	5	1	1	1	1	1	1	2	9	9	9	9	9	9	1	1	1	1	1	1	0	0	0	0
k	265	34	1	4	37	2	1	9	3	2	2	2	2	2	2	1	2	1	2	4	2	2	1	9	2	5	1	1	1	1	1	2	2	9	9	9	9	9	9	2	1	2	9	9	9	9	9	9	0
t	271	35	2	3	40	2	2	2	3	2	2	2	1	2	1	1	1	1	2	4	2	1	1	9	1	5	2	2	2	2	2	1	2	9	9	9	9	9	9	2	1	1	1	0	1	0	0	0	0
t	273	30	2	3	41	2	2	2	3	2	2	2	2	2	1	1	1	1	2	3	2	1	1	9	1	5	2	2	2	1	1	1	2	9	9	9	9	9	9	2	1	2	9	9	9	9	9	9	0
s	275	30	2	4	39	2	2	2	3	2	2	2	1	1	1	1	1	1	2	4	1	1	1	9	2	5	1	1	2	1	2	1	2	9	9	9	9	9	9	2	1	1	1	0	0	0	0	0	0
s	276	31	1	4	40	2	2	2	3	2	2	2	1	1	1	1	2	1	2	4	3	1	1	9	1	5	1	2	1	1	1	1	2	9	9	9	9	9	9	1	2	2	9	9	9	9	9	9	9
s	278	32	1	4	39	2	2	2	3	2	2	2	1	2	1	2	1	1	2	4	2	2	1	9	2	5	1	2	2	2	2	1	2	9	9	9	9	9	9	2	2	2	9	9	9	9	9	9	9
s	280	40	3	3	39	2	2	2	3	2	2	2	1	1	1	2	2	1	2	3	3	1	2	3	2	6	1	2	1	1	2	6	2	9	9	9	9	9	9	2	1	2	9	9	9	9	9	9	0
k	282	36	2	4	37	2	1	9	1	2	2	2	2	2	1	1	1	1	2	4	1	2	1	9	2	5	1	2	1	2	1	1	2	9	9	9	9	9	9	2	1	2	9	9	9	9	9	9	0
k	285	34	1	4	39	2	2	2	3	2	2	2	1	2	1	1	2	1	2	3	2	1	2	3	2	5	1	1	1	1	1	1	2	9	9	9	9	9	9	2	1	1	0	1	0	0	0	0	0
t	292	26	2	3	40	2	2	2	3	2	2	2	1	1	2	2	1	1	2	3	4	1	1	9	1	5	1	2	1	2	1	1	2	9	9	9	9	9	9	2	1	2	9	9	9	9	9	9	0
t	294	36	1	3	40	2	1	9	3	2	2	2	2	2	2	2	2	1	2	3	2	1	1	9	2	6	2	2	2	2	2	2	2	9	9	9	9	9	9	2	1	2	9	9	9	9	9	9	0
c	302	30	2	3	38	2	2	2	1	2	2	2	2	2	1	1	1	1	2	4	1	1	1	9	1	6	2	2	3	2	1	1	2	9	9	9	9	9	9	2	2	1	1	0	0	0	0	0	9
c	305	30	1	4	41	2	2	2	3	2	2	2	2	2	1	1	2	1	2	3	2	1	1	9	2	6	1	1	1	1	1	1	2	1	2	2	9	9	9	1	2	2	9	9	9	9	9	9	0
c	307	35	3	4	38	2	2	2	3	2	2	2	2	2	1	1	1	1	2	3	2	1	1	9	2	6	1	1	1	1	1	1	2	9	9	9	9	9	9	2	1	1	0	1	0	0	0	0	0
k	309	27	2	3	39	2	2	2	3	2	2	2	1	2	1	1	1	1	2	3	3	1	1	9	1	1	1	2	1	1	1	1	2	9	9	9	9	9	9	2	1	2	9	9	9	9	9	9	0
k	313	29	1	4	38	2	2	2	3	2	2	2	1	2	1	1	2	1	2	3	1	1	2	3	2	5	1	1	1	1	2	1	2	9	9	9	9	9	9	2	1	2	9	9	9	9	9	9	0
k	320	29	1	3	37	2	2	2	3	2	2	2	1	1	2	2	2	1	2	3	3	1	1	9	2	5	1	1	1	1	1	1	2	9	9	9	9	9	9	2	1	1	0	1	1	0	0	0	0
k	324	33	1	3	41	2	1	9	3	2	2	2	2	2	2	2	1	1	2	3	4	1	2	3	1	5	1	2	1	2	1	1	1	0	1	0	0	0	0	2	1	1	0	1	0	0	0	0	0
k	326	29	2	3	40	2	2	2	3	2	2	2	1	1	1	1	1	1	2	3	3	1	1	9	2	5	1	2	1	2	1	2	2	9	9	9	9	9	9	2	1	1	1	0	0	0	0	1	0
t	327	27	3	4	40	2	2	2	3	2	2	2	1	2	1	1	2	1	2	2	3	1	2	3	2	6	2	2	1	2	1	4	1	0	0	0	1	0	0	2	1	1	0	0	1	1	0	0	0
k	332	30	1	3	39	2	2	2	3	2	2	2	1	2	1	2	2	1	2	4	1	1	1	9	2	5	2	2	1	2	1	1	2	9	9	9	9	9	9	2	1	2	9	9	9	9	9	9	0
k	333	31	3	3	39	2	2	2	3	2	2	2	1	1	1	1	1	1	2	3	3	1	2	3	1	6	2	1	2	2	1	2	2	9	9	9	9	9	9	1	1	2	9	9	9	9	9	9	0
c	338	27	2	4	39	2	2	2	3	2	2	2	1	2	1	1	1	1	2	3	2	1	1	9	2	3	1	1	1	1	1	1	2	9	#NULL!	9	9	9	9	2	1	2	9	9	9	9	9	9	0
k	339	33	2	4	39	2	2	2	3	2	2	2	1	1	1	1	1	1	2	4	2	1	1	9	2	6	1	1	1	1	1	1	2	9	9	9	9	9	9	1	1	1	1	0	0	0	0	0	0
t	340	29	1	3	40	2	2	2	3	2	2	2	1	2	2	2	2	1	2	3	3	1	1	9	2	5	2	1	1	1	2	1	2	9	9	9	9	9	9	2	1	1	0	0	0	0	0	0	0
k	343	30	2	3	40	2	2	2	3	2	2	2	1	2	1	1	1	1	2	3	3	1	1	9	1	5	1	1	1	1	1	1	2	9	9	9	9	9	9	1	1	1	1	0	0	0	0	0	99
t	347	23	1	3	41	2	2	2	3	2	2	2	1	2	1	1	2	1	2	2	4	1	2	3	2	6	1	1	1	2	1	1	2	9	9	9	9	9	9	2	1	2	9	9	9	9	9	9	0
t	353	39	2	3	40	2	2	2	3	2	2	2	1	1	1	1	2	1	2	2	4	1	1	3	2	6	1	1	1	1	1	1	2	9	9	9	9	9	9	2	2	2	9	9	9	9	9	9	9
t	354	33	1	4	40	2	2	2	3	2	2	2	1	1	1	1	2	1	2	3	3	1	2	3	1	5	1	1	1	1	1	1	2	9	9	9	9	9	9	2	1	2	9	9	9	9	9	9	0
c	355	32	2	4	39	2	2	2	3	2	2	2	1	1	1	1	1	1	2	3	1	1	99	99	1	6	1	2	1	1	1	2	1	0	1	0	0	0	0	2	1	1	0	1	0	0	0	0	0
t	356	34	1	4	38	2	2	2	3	2	2	2	1	2	1	1	2	1	2	3	1	1	1	9	1	5	1	1	1	1	1	1	2	9	9	9	9	9	9	2	1	2	9	9	9	9	9	9	0
c	359	37	2	3	39	2	2	2	3	2	2	2	1	2	1	1	1	1	2	4	3	1	2	3	2	3	1	2	2	2	1	1	2	9	9	9	9	9	9	2	1	2	9	9	9	9	9	9	0
t	360	33	1	3	39	2	2	2	3	2	2	2	1	2	1	1	2	1	2	3	2	1	1	9	2	6	1	1	1	1	1	3	2	9	9	9	9	9	9	2	1	1	1	1	0	0	0	0	0
s	361	26	1	3	39	2	2	2	3	2	2	2	1	1	1	1	2	1	2	1	4	1	2	3	1	6	2	2	2	2	1	6	1	0	0	0	1	0	0	2	1	1	0	1	0	1	0	0	0
s	367	31	1	4	38	2	1	9	3	2	2	2	2	2	1	1	2	1	2	4	2	1	1	9	2	5	1	2	1	2	2	1	2	9	9	9	9	9	9	2	1	2	9	9	9	9	9	9	0
t	368	30	1	3	37	2	1	9	3	2	99	2	1	2	1	1	2	1	2	4	3	1	1	9	2	5	1	1	1	1	2	1	2	9	9	9	9	9	9	2	1	2	9	9	9	9	9	9	0
t	369	30	1	3	39	2	2	2	3	2	2	2	1	1	2	1	2	1	2	4	2	1	1	9	2	5	1	1	1	1	1	1	2	9	9	9	9	9	9	2	1	1	1	0	0	0	0	0	0
t	371	29	2	3	38	2	99	2	3	2	2	2	1	1	1	1	1	1	2	3	2	1	1	9	1	6	1	1	1	1	1	1	2	9	9	9	9	9	9	2	1	2	9	9	9	9	9	9	0
s	372	36	2	4	38	2	2	2	3	2	2	2	1	2	1	1	1	1	2	4	1	1	1	9	2	5	2	3	2	2	2	1	2	9	9	9	9	9	9	1	2	1	1	0	0	0	0	0	9
t	373	23	2	3	38	2	1	9	3	2	2	2	2	1	1	1	2	1	2	3	2	1	1	9	2	5	1	2	1	1	2	1	2	9	9	9	9	9	9	2	1	1	1	0	0	0	0	0	0
t	374	37	3	4	41	2	2	2	3	2	2	2	1	1	1	1	1	1	2	2	3	1	2	3	1	6	1	1	1	1	1	1	1	1	0	0	0	0	0	2	1	1	1	0	0	0	0	0	0
t	376	29	2	3	40	2	2	2	1	2	2	2	1	1	1	1	1	1	2	2	2	1	2	3	2	6	1	1	1	1	1	1	2	9	9	9	9	9	9	2	1	1	1	1	1	0	0	0	99
s	378	35	2	4	40	2	2	2	3	2	2	2	1	2	1	1	1	1	2	4	3	1	1	9	2	5	3	2	2	2	2	1	2	9	9	9	9	9	9	2	1	1	1	0	0	0	0	0	0
s	380	31	1	4	40	2	2	2	3	2	2	2	1	2	1	1	2	1	2	4	3	1	1	9	1	5	1	1	1	1	1	1	2	9	9	9	9	9	9	2	2	1	1	0	0	0	0	0	9
s	383	36	1	4	39	2	2	2	3	2	2	2	1	2	1	1	2	1	2	2	4	1	2	3	1	5	1	2	2	2	1	1	2	9	9	9	9	9	9	2	1	1	0	1	0	0	0	0	0
s	384	32	1	4	40	2	2	2	3	2	2	2	1	1	1	1	2	1	2	3	4	1	1	9	2	5	1	1	1	1	1	2	1	0	0	0	1	0	0	2	1	1	0	1	0	1	0	0	0
s	386	37	3	4	40	2	2	2	3	2	2	2	1	2	1	1	1	1	2	3	2	1	2	3	1	6	1	1	1	1	1	1	2	9	9	9	9	9	9	2	1	2	9	9	9	9	9	9	0
s	387	35	1	3	40	2	2	2	1	2	2	2	2	1	1	1	2	1	2	99	2	1	2	3	2	99	1	1	1	1	1	2	2	9	9	9	9	9	9	2	1	2	9	9	9	9	9	9	0
t	388	21	2	3	39	2	2	2	3	2	2	2	1	1	1	1	2	1	2	2	3	1	2	1	1	6	1	1	2	2	1	5	1	0	0	1	0	0	0	2	1	1	0	0	1	0	0	0	0
t	389	42	1	3	39	2	2	2	3	2	2	2	1	2	2	2	2	1	2	2	2	1	1	9	2	6	1	1	1	1	1	6	1	0	0	1	0	0	0	2	1	1	0	0	1	0	0	0	0
t	390	34	1	3	39	2	2	2	3	2	2	2	1	1	1	1	2	1	2	4	3	1	1	9	2	5	1	2	1	2	1	1	2	9	9	9	9	9	9	2	1	1	1	1	0	0	0	0	0
t	391	31	2	3	39	2	2	2	2	2	2	2	2	2	1	1	1	1	2	3	2	1	1	9	2	6	1	1	1	1	1	1	2	9	9	9	9	9	9	1	2	2	9	9	9	9	9	9	9
s	395	36	1	3	37	2	1	9	2	2	2	2	2	2	1	1	1	1	2	3	2	1	1	9	1	5	1	1	1	2	1	1	2	9	9	9	9	9	9	2	1	2	9	9	9	9	9	9	0
k	1	42	5	4	39	2	2	2	3	2	2	2	2	2	1	1	2	2	2	2	2	1	1	9	2	6	1	1	1	1	1	6	2	9	9	9	9	9	9	2	1	1	1	1	1	0	0	0	99
s	5	33	1	3	38	2	1	9	1	2	2	2	2	2	1	1	2	2	2	3	1	2	2	3	2	5	1	2	1	1	1	4	2	9	9	9	9	9	9	1	1	1	1	0	1	0	0	0	0
k	18	26	4	4	40	2	2	2	3	2	2	2	2	2	1	1	1	2	1	1	2	1	2	2	2	6	1	1	1	1	1	1	2	9	9	9	9	9	9	2	1	1	0	1	0	0	0	0	0
k	19	37	1	4	38	2	1	9	3	2	2	2	2	2	1	1	2	2	2	3	3	1	1	9	2	5	1	1	2	2	1	2	2	9	9	9	9	9	9	2	1	1	0	1	0	0	0	1	0
s	20	26	1	3	39	2	2	2	3	2	2	2	1	1	1	1	2	2	2	4	2	1	1	9	1	5	1	1	1	1	1	2	2	9	9	9	9	9	9	2	1	2	9	9	9	9	9	9	0
k	21	31	1	4	40	2	1	9	1	2	2	2	2	2	1	1	2	2	2	4	1	2	1	9	1	5	1	1	1	2	#NULL!	3	2	9	9	9	9	9	9	2	1	#NULL!	#NULL!	#NULL!	#NULL!	#NULL!	#NULL!	#NULL!	0
k	24	29	1	4	39	2	2	2	3	2	2	2	1	2	2	2	2	2	2	2	3	1	2	3	1	6	2	2	1	2	1	2	2	9	9	9	9	9	9	2	1	2	9	9	9	9	9	9	0
k	25	25	1	4	40	2	2	2	3	2	2	2	1	2	1	1	2	2	2	4	3	1	1	9	2	1	1	1	1	1	1	2	1	1	0	0	0	0	0	1	1	1	1	0	0	0	0	0	0
s	26	35	2	4	40	2	2	2	3	2	2	2	1	1	1	2	1	2	2	3	1	1	2	3	1	1	1	1	1	1	1	1	2	9	9	9	9	9	9	2	1	2	9	9	9	9	9	9	0
s	31	34	2	3	38	2	1	9	3	2	2	2	2	2	1	1	1	2	2	3	4	1	1	9	2	5	2	2	2	2	2	3	2	9	9	9	9	9	9	2	1	2	9	9	9	9	9	9	0
k	34	37	2	4	40	2	2	2	3	2	2	2	2	2	2	2	2	2	2	2	1	1	2	3	1	6	1	1	1	1	1	6	2	9	9	9	9	9	9	2	1	2	9	9	9	9	9	9	0
k	39	31	1	4	40	2	2	2	3	2	2	2	2	2	1	1	2	2	3	4	2	1	1	9	2	5	1	1	1	1	1	1	2	9	9	9	9	9	9	2	1	2	9	9	9	9	9	9	0
s	41	29	1	3	39	2	2	2	3	2	2	2	1	1	1	1	2	2	2	4	2	1	1	9	2	6	1	1	1	1	2	1	2	9	9	9	9	9	9	2	1	1	1	0	0	0	0	0	0
s	44	33	1	3	40	2	2	2	3	2	2	2	1	2	1	1	2	2	2	4	4	1	1	9	1	5	2	2	3	2	2	3	2	9	9	9	9	9	9	2	1	1	1	0	0	0	0	0	0
s	45	36	1	3	39	2	2	1	3	2	2	2	2	2	1	1	2	2	2	4	1	1	1	9	2	5	1	1	1	1	1	3	2	9	9	9	9	9	9	2	1	1	1	0	0	0	0	0	0
s	49	32	1	4	40	2	2	2	3	2	2	2	2	2	2	2	2	2	2	4	3	1	2	3	1	6	1	2	1	1	1	1	2	9	9	9	9	9	9	2	1	1	0	0	0	1	0	0	0
c	51	30	2	3	39	2	2	2	3	2	2	2	1	1	1	2	1	2	2	4	1	1	1	9	2	6	1	1	1	1	1	2	2	9	9	9	9	9	9	2	1	1	1	1	0	0	0	0	0
c	59	23	1	4	39	2	2	2	3	2	2	2	9	9	1	2	2	2	2	2	3	1	2	3	1	5	2	2	2	2	3	1	2	9	9	9	9	9	9	2	1	1	1	1	1	1	0	0	0
t	65	22	1	4	39	2	2	2	3	2	2	2	1	2	1	1	1	2	2	3	4	1	1	9	2	5	1	1	1	1	1	2	2	9	9	9	9	9	9	2	1	2	9	9	9	9	9	9	0
t	71	31	2	4	40	2	1	9	3	2	2	2	2	2	1	1	1	2	2	1	1	1	2	1	1	3	1	1	2	2	1	2	2	9	9	9	9	9	9	2	1	1	0	1	1	0	0	1	0
t	83	35	1	4	40	2	2	2	3	2	2	2	1	2	2	2	2	2	2	4	2	1	1	9	2	5	1	1	1	1	1	1	2	9	9	9	9	9	9	2	1	1	0	1	1	0	0	0	0
t	94	35	2	4	41	2	99	99	3	2	2	2	1	1	2	2	2	2	2	2	2	1	2	3	1	4	1	2	2	2	1	1	1	0	0	0	1	0	0	2	1	1	0	0	1	1	0	0	0
t	108	26	2	3	40	2	2	2	3	2	2	2	2	2	2	2	2	2	2	2	4	1	2	2	1	6	2	2	3	2	2	5	2	9	9	9	9	9	9	2	1	2	9	9	9	9	9	9	0
c	116	35	1	4	39	2	2	2	1	2	2	2	2	2	1	1	2	2	2	3	2	1	1	9	2	6	1	1	1	1	1	1	1	0	0	1	0	0	0	2	1	1	0	0	1	0	0	0	0
c	117	39	2	3	40	2	2	2	3	2	2	2	1	2	1	1	1	2	2	3	3	1	1	9	2	5	1	1	2	1	2	6	2	9	9	9	9	9	9	2	1	1	1	1	0	0	0	0	0
c	123	22	1	4	39	2	2	2	3	2	2	2	1	1	1	1	2	2	2	2	1	2	1	9	2	5	1	1	1	1	1	1	2	9	9	9	9	9	9	1	1	1	0	0	1	0	0	0	0
c	124	37	2	4	38	2	2	2	3	2	2	2	1	2	1	1	1	2	2	4	2	1	1	9	1	5	1	1	1	1	2	2	2	9	9	9	9	9	9	2	1	2	9	9	9	9	9	9	0
t	130	34	2	4	41	2	1	9	3	2	2	2	2	2	1	1	1	2	2	4	1	1	2	3	2	2	1	1	1	1	1	1	2	9	9	9	9	9	9	1	1	1	0	0	0	0	0	0	0
t	132	33	1	4	39	2	2	2	3	2	2	2	1	2	1	1	2	2	2	4	3	1	1	9	2	5	2	2	1	2	2	2	2	9	9	9	9	9	9	2	1	2	9	9	9	9	9	9	0
t	141	34	2	4	39	2	2	2	3	2	2	2	1	1	1	1	1	2	2	2	4	1	99	99	2	6	1	2	1	2	1	2	2	9	9	9	9	9	9	2	1	2	9	9	9	9	9	9	0
t	145	31	1	4	38	2	2	2	3	2	2	2	2	2	2	2	2	2	2	4	2	1	1	9	2	6	1	1	1	1	1	2	2	9	9	9	9	9	9	2	1	2	9	9	9	9	9	9	0
t	148	19	1	4	41	2	2	2	3	2	2	2	1	2	1	1	2	2	2	1	3	1	2	3	2	5	1	1	1	1	1	1	2	9	9	9	9	9	9	2	1	1	0	0	1	1	0	0	0
c	155	34	1	3	39	2	1	9	3	2	2	2	2	2	2	2	2	2	2	2	3	1	1	9	2	5	1	1	1	1	1	2	2	9	9	9	9	9	9	2	1	1	0	1	0	0	0	0	0
c	159	19	1	3	39	2	2	99	3	2	2	2	1	2	1	2	2	2	2	1	3	1	99	99	1	6	2	3	2	2	2	6	2	9	9	9	9	9	9	2	1	2	9	9	9	9	9	9	0
c	160	37	1	3	40	2	2	1	3	2	2	2	2	2	2	2	2	2	2	4	3	1	2	3	2	5	1	1	2	1	2	2	2	9	9	9	9	9	9	2	1	1	0	1	0	0	0	0	0
t	165	36	1	4	39	2	2	2	3	2	2	2	1	2	1	1	99	2	2	3	1	1	1	9	2	6	1	1	1	1	1	2	2	9	9	9	9	9	9	2	1	2	9	9	9	9	9	9	0
c	171	33	2	3	39	2	1	9	1	2	2	2	2	1	1	1	2	2	2	4	2	1	1	9	2	5	1	1	1	1	1	2	2	9	9	9	9	9	9	2	1	2	9	9	9	9	9	9	0
t	175	36	2	4	38	2	2	2	3	2	2	2	1	2	1	1	2	2	2	2	2	1	2	3	1	6	1	1	1	1	1	6	2	9	9	9	9	9	9	2	1	1	0	1	0	0	0	0	0
c	180	36	2	3	39	2	2	2	3	2	2	2	1	2	1	2	1	2	2	3	4	1	99	99	2	6	1	2	2	2	2	3	2	9	9	9	9	9	9	2	1	2	9	9	9	9	9	9	0
c	183	27	3	3	38	2	1	9	3	2	2	2	1	1	1	1	2	2	2	1	2	1	1	9	2	6	2	2	1	2	1	1	2	9	9	9	9	9	9	2	1	2	9	9	9	9	9	9	0
t	192	26	2	4	38	2	2	2	3	2	2	2	2	1	1	1	2	2	1	1	3	1	2	1	2	1	2	1	2	3	1	6	2	9	9	9	9	9	9	2	1	1	1	1	1	0	0	0	0
t	195	30	1	3	38	2	2	2	3	2	2	2	1	2	2	2	2	2	2	2	3	1	1	9	2	6	1	2	2	1	2	6	1	0	0	1	0	0	0	2	1	1	0	1	1	0	0	0	0
c	198	31	2	3	39	2	2	2	3	2	2	2	2	2	1	1	1	2	2	2	3	1	1	9	2	6	1	2	1	2	1	1	1	0	0	0	1	0	0	2	1	1	1	1	1	1	0	0	0
c	199	31	3	3	39	2	2	2	3	2	2	2	2	2	1	2	1	2	2	4	3	1	1	9	2	5	1	2	1	2	1	3	2	9	9	9	9	9	9	2	1	2	9	9	9	9	9	9	0
t	202	33	1	3	39	2	2	2	3	2	2	2	1	1	1	2	2	2	2	4	2	1	2	3	2	6	1	2	2	2	1	2	2	9	9	9	9	9	9	2	1	1	0	1	0	0	0	0	0
c	205	43	1	3	41	2	1	9	3	2	2	2	1	2	1	1	2	2	2	4	4	1	1	9	2	6	2	1	1	2	2	3	2	9	9	9	9	9	9	2	1	1	0	1	0	0	0	0	0
t	212	30	1	3	39	2	2	1	3	2	2	2	1	2	2	2	2	2	2	3	2	1	1	9	1	6	1	1	1	1	1	3	2	9	9	9	9	9	9	2	1	1	0	1	0	0	0	0	0
t	216	36	2	4	40	2	2	2	3	2	2	2	2	2	2	2	2	2	2	2	2	1	1	3	1	3	1	1	1	1	1	1	2	9	9	9	9	9	9	2	1	2	9	9	9	9	9	9	0
c	223	28	1	3	40	2	2	2	3	2	2	2	1	1	2	2	2	2	2	4	2	1	1	9	2	5	1	1	1	1	2	1	2	9	9	9	9	9	9	2	1	2	9	9	9	9	9	9	0
t	227	26	1	3	41	2	2	2	3	2	2	2	1	2	1	1	2	2	2	3	2	1	1	9	1	5	1	1	1	1	1	2	2	9	9	9	9	9	9	2	1	2	9	9	9	9	9	9	0
s	233	30	2	3	38	2	2	2	3	2	2	2	1	2	1	2	2	2	2	3	2	1	2	3	2	5	2	2	2	2	1	3	2	9	9	9	9	9	9	2	1	1	0	1	0	0	0	0	0
k	240	23	1	4	40	2	2	2	3	2	2	2	1	2	1	1	2	2	2	2	3	1	2	3	1	6	2	2	2	2	2	2	2	9	9	9	9	9	9	2	1	1	0	0	1	1	0	0	0
s	247	23	2	3	39	2	2	2	3	2	2	2	1	1	1	1	2	2	2	4	4	1	2	1	1	6	1	2	1	2	1	2	2	9	9	9	9	9	9	2	1	1	1	1	1	0	0	0	0
t	252	25	1	3	37	2	2	2	3	2	2	2	1	1	1	1	2	2	2	2	2	1	2	3	1	5	2	2	2	2	1	2	2	9	9	9	9	9	9	2	1	2	9	9	9	9	9	9	1
t	254	36	1	3	39	2	2	2	3	2	2	2	2	1	1	1	2	2	2	3	2	1	1	9	2	6	2	2	2	1	1	2	2	9	9	9	9	9	9	2	1	2	9	9	9	9	9	9	0
t	255	32	2	3	40	2	2	2	3	2	2	2	1	1	1	1	1	2	2	3	3	1	1	9	2	5	1	1	2	1	1	2	2	9	9	9	9	9	9	2	1	1	0	1	0	0	0	0	0
t	258	28	1	4	41	2	2	2	3	2	2	2	1	2	1	1	2	2	2	3	3	1	1	9	2	6	1	1	1	1	1	1	2	9	9	9	9	9	9	2	1	2	9	9	9	9	9	9	0
s	260	32	1	3	41	2	2	2	3	2	2	2	1	2	2	2	2	2	2	3	3	1	1	9	2	5	2	2	2	1	1	6	2	9	9	9	9	9	9	2	1	2	9	9	9	9	9	9	0
k	267	31	4	4	39	2	99	99	3	2	2	2	2	2	1	1	1	2	2	4	4	2	1	9	1	99	99	99	99	99	99	5	2	9	9	9	9	9	9	2	1	1	0	0	0	1	0	0	0
t	270	30	1	3	39	2	2	1	3	2	2	2	2	2	2	2	2	2	2	3	2	1	1	9	2	6	2	2	1	2	1	2	2	9	9	9	9	9	9	2	1	1	0	0	0	0	0	1	0
s	274	38	1	3	39	2	1	9	3	2	2	2	2	2	2	2	2	2	2	4	1	1	1	9	2	5	1	1	1	2	1	2	2	9	9	9	9	9	9	2	1	2	9	9	9	9	9	9	0
k	281	33	1	4	39	2	2	2	3	2	2	2	2	2	1	1	2	2	2	4	3	1	2	1	1	5	2	99	99	99	2	1	2	9	9	9	9	9	9	2	1	2	9	9	9	9	9	9	0
t	284	29	1	3	40	2	2	2	3	2	2	2	2	2	2	2	2	2	2	4	4	1	1	9	2	3	1	1	1	1	2	2	2	9	9	9	9	9	9	2	1	1	1	1	0	0	0	0	0
t	288	36	3	3	38	2	2	2	3	2	2	2	1	1	1	1	1	2	2	4	2	1	1	9	2	1	1	1	1	2	1	1	2	9	9	9	9	9	9	2	1	2	9	9	9	9	9	9	0
t	289	39	1	4	38	2	2	2	3	2	2	2	1	2	2	2	2	2	2	4	3	1	1	9	2	5	2	2	2	2	1	6	1	1	0	1	0	0	0	2	1	1	1	1	1	0	0	0	0
t	293	36	2	4	38	2	1	9	3	2	2	2	2	2	2	1	1	2	2	3	3	1	1	9	1	6	1	2	2	1	1	2	2	9	9	9	9	9	9	2	1	2	9	9	9	9	9	9	0
c	298	31	1	4	38	2	2	2	3	2	2	2	2	1	1	1	2	2	2	3	3	1	2	3	2	5	2	2	1	1	2	1	2	9	9	9	9	9	9	2	1	2	9	9	9	9	9	9	0
c	299	30	1	4	40	2	2	2	3	2	2	2	1	2	2	2	2	2	2	4	1	1	2	3	2	1	1	1	1	1	1	6	2	9	9	9	9	9	9	2	1	1	0	1	0	0	0	0	0
k	314	38	3	3	40	2	2	2	3	2	2	2	1	1	2	1	2	2	2	3	4	1	1	9	2	6	1	1	1	3	2	3	2	9	9	9	9	9	9	1	1	2	9	9	9	9	9	9	0
k	316	34	1	3	40	2	2	2	3	2	2	2	2	2	1	2	2	2	2	2	2	1	2	3	1	3	1	1	1	1	1	3	2	9	9	9	9	9	9	2	1	2	9	9	9	9	9	9	0
c	319	30	4	3	39	2	2	2	3	2	2	2	1	2	1	1	1	2	1	2	2	1	2	3	1	1	1	1	1	1	1	4	1	0	0	1	0	0	0	2	1	1	0	0	1	0	0	0	0
k	325	26	1	3	40	2	2	2	3	2	2	2	2	99	1	1	2	2	1	3	3	1	99	99	1	99	1	1	1	1	1	2	2	9	9	9	9	9	9	2	1	1	0	0	1	0	0	0	0
k	329	25	1	4	39	2	2	2	3	2	2	2	2	2	1	1	2	2	2	4	2	1	1	9	1	6	1	1	1	1	1	1	2	9	9	9	9	9	9	2	1	2	9	9	9	9	9	9	0
t	330	40	1	4	40	2	2	1	3	2	2	2	1	1	1	1	1	2	2	4	1	2	1	9	2	6	1	1	1	1	1	3	99	99	99	99	99	99	99	2	1	1	0	1	1	0	0	0	0
k	334	35	3	4	37	2	2	2	3	2	2	2	1	2	2	1	2	2	2	2	3	1	2	3	2	6	1	1	1	1	1	2	2	9	9	9	9	9	9	2	1	1	0	1	0	0	0	0	0
t	342	32	1	4	39	2	2	2	3	2	2	2	1	1	2	2	2	2	2	3	2	1	1	9	2	6	1	2	1	1	1	3	2	9	9	9	9	9	9	2	1	1	1	1	1	0	0	0	0
t	345	36	1	4	40	2	2	2	3	2	2	2	2	2	1	2	2	2	2	4	2	1	1	9	2	6	1	1	1	1	1	6	2	9	9	9	9	9	9	2	1	1	1	0	0	0	0	0	0
t	348	34	2	3	40	2	2	2	3	2	2	2	2	2	2	1	1	2	2	2	1	1	1	9	2	6	1	1	1	1	1	6	2	9	9	9	9	9	9	2	1	1	0	1	1	0	0	0	0
t	349	34	1	3	40	2	2	2	3	2	2	2	1	1	1	1	2	2	2	4	2	1	1	9	2	6	2	1	1	1	1	1	2	9	9	9	9	9	9	1	1	1	0	0	0	0	0	0	0
t	351	30	1	3	39	2	2	2	3	2	2	2	2	2	1	2	2	2	2	3	2	1	2	3	1	6	1	1	1	1	2	1	2	9	9	9	9	9	9	2	1	2	9	9	9	9	9	9	0
t	358	24	1	4	38	2	2	2	3	2	2	2	2	2	1	1	2	2	2	2	3	1	2	1	1	6	1	1	1	1	1	6	2	9	9	9	9	9	9	2	1	1	0	0	1	0	0	0	0
s	363	34	1	3	39	2	2	2	3	2	2	2	1	2	1	1	2	2	2	2	3	1	1	9	2	3	1	2	1	1	1	6	2	9	9	9	9	9	9	2	1	2	9	9	9	9	9	9	0
s	364	39	1	3	39	2	2	2	3	2	2	2	1	2	2	2	2	2	2	4	2	1	1	9	1	2	1	1	1	1	1	3	2	9	9	9	9	9	9	2	1	2	9	9	9	9	9	9	0
s	370	40	4	3	39	2	2	2	3	2	2	2	1	2	1	1	1	2	2	3	3	1	1	9	1	5	1	2	2	2	1	4	2	9	9	9	9	9	9	2	1	1	1	0	0	0	0	0	0
s	379	32	1	4	40	2	2	2	3	2	2	2	1	2	1	2	2	2	2	3	1	1	1	9	2	6	2	2	2	2	1	3	2	9	9	9	9	9	9	2	1	1	0	1	1	0	0	0	0
s	394	34	3	3	40	2	2	2	3	2	2	2	1	1	1	1	1	2	2	4	2	1	1	9	2	3	1	1	1	1	1	1	2	9	9	9	9	9	9	2	1	1	1	0	0	0	0	0	0
[truncated: 83 more columns]
