# Supplementary material for: Development of the breastfeeding support scale to measure breastfeeding support from lay and professional persons, and its predictive validity in Japan
Source: PeerJ journal article supplement (doi:10.7717/peerj.11779), 2021-07-27
Supplement: Table_S3._Questionnaire_with_31__items.docx [file Table_S3._Questionnaire_with_31__items.docx]

Supplementary Table 3. Questionnaire with 31 items

母乳育児をするにあたって、あなたはどのような状況にありますか。

次にお示しする項目それぞれについて　「あてはまる」から「あてはまらない」でお答え下さい。

How do you perceive your breastfeeding situation? Please choose you answer to each item presented below from “Does not apply to me” to “Applies to me.”

|  |  | **あてはまらない** | **ややあてはまらない** | **どちらともいえない** | **ややあてはまる** | **あてはまる** |
| --- | --- | --- | --- | --- | --- | --- |
| 1 | 母乳育児について気楽に話せる相手がいる。  There is someone with whom I can easily and openly discuss breastfeeding. | **1** | **2** | **3** | **4** | **5** |
| 2 | 赤ちゃんにおっぱいをあげる時間をとりやすいように、家事や育児を負担してくれる人がいる。  There is someone who helps with other child care and with housework such that it’s easy for me to make time to breastfeed my baby. | **1** | **2** | **3** | **4** | **5** |
| 3 | 身近な人が、母乳育児をしているあなたの心の支えになってくれる。  There is someone close to you who gives you emotional support in breastfeeding. | **1** | **2** | **3** | **4** | **5** |
| 4 | 母乳育児の良かった経験を話してくれる人がいる。  There is someone who tells me about positive experiences of breastfeeding. | **1** | **2** | **3** | **4** | **5** |
| 5 | あなたが赤ちゃんのお世話をしやすいように、家事や育児を負担してくれる人がいる。  There is someone who helps you with other child care and with housework such that it’s easy for you to take care of your baby. | **1** | **2** | **3** | **4** | **5** |
| 6 | 人工乳（ミルク）の無料サンプルや割引クーポンを手渡されたり送られたりすることがある。  I have received free samples or discount coupons for formula milk. | **1** | **2** | **3** | **4** | **5** |
| 7 | 必要になったら、母乳育児について家族や友人以外の人（たとえば、医療関係者や母乳育児支援グループの人）に相談できる。  If necessary, there is someone other than family or friends (e.g. health care provider, breastfeeding support group member) whom I can consult on breastfeeding. | **1** | **2** | **3** | **4** | **5** |
| 8 | 医師、助産師、保健師などの医療関係者の多くは、あなたの母乳育児を応援している。  Most health care providers (doctors, public health nurses, midwives, etc.) support you in breastfeeding. | **1** | **2** | **3** | **4** | **5** |
| 9 | 医師、助産師、保健師などの医療関係者が、母乳育児の利点を教えてくれる。  Health care providers including doctors, public health nurses, or midwives tell me about the benefits of breastfeeding. | **1** | **2** | **3** | **4** | **5** |
| 10 | 外出先で快適におっぱいをあげられる。  I can breastfeed comfortably when I’m out and about. | **1** | **2** | **3** | **4** | **5** |
| 11 | 人工乳の製品情報に、母乳も人工乳も赤ちゃんの健康にとってそれほどの差はないと書かれているのを見かける。  I see formula milk with product information saying that breastmilk and artificial milk do not differ much in their health benefits for babies. | **1** | **2** | **3** | **4** | **5** |
| 12 | 乳業会社の栄養士や相談員から授乳についての助言をうけることがある。  I have received advice regarding infant feeding from people employed by the dairy industry (“advisors”, nutritionists, etc.). | **1** | **2** | **3** | **4** | **5** |
| 13 | 本や雑誌、インターネットなどの情報は母乳育児の助けになる。  Information from books, magazines, and the Internet is useful for breastfeeding. | **1** | **2** | **3** | **4** | **5** |
| 14 | 家事や上の子の育児のために、赤ちゃんに母乳以外のものを与えざるを得ないことがある。  Sometimes I provide something other than breastmilk to my baby because housework or parenting of an elder child gets in the way. | **1** | **2** | **3** | **4** | **5** |
| 15 | テレビや新聞などの報道によって母乳育児に不安を感じさせられることがある。  Information from television, newspapers, etc. sometimes makes me anxious about breastfeeding. | **1** | **2** | **3** | **4** | **5** |
| 16 | 身近な人から、赤ちゃんをおっぱいから早く卒業させるように勧められる。  There is someone close to me who encourages me to wean my baby from the breast soon. | **1** | **2** | **3** | **4** | **5** |
| 17 | 母乳育児について困ったことがある時に相談できる人がいる。  There is someone I can talk with whenever I have issues with breastfeeding. | **1** | **2** | **3** | **4** | **5** |
| 18 | 母乳育児中はどんな薬も服用してはいけないと聞いたことがある。  I have heard that I must not take any medicine while breastfeeding. | **1** | **2** | **3** | **4** | **5** |
| 19 | 医師、助産師、保健師などの医療関係者が母乳育児について言うことはまちまちだ。  There are discrepancies among what health care providers (doctors, public health nurses, midwives, etc.) say about breastfeeding. | **1** | **2** | **3** | **4** | **5** |
| 20 | 医療施設で人工乳のポスターやロゴを目にすることがある。  In medical facilities I see posters or logos about formula milk. | **1** | **2** | **3** | **4** | **5** |
| 21 | メディアやインターネットからの母乳育児についての情報に混乱させられる。  Information on breastfeeding from mass media or the Internet confuses me. | **1** | **2** | **3** | **4** | **5** |
| 22 | 母乳育児中は食べてはいけないものがいろいろとあると聞く。  I have heard that there are certain things I should not eat while breastfeeding. | **1** | **2** | **3** | **4** | **5** |
| 23 | 身近な人から、母乳以外のものを赤ちゃんに与えるように勧められる。  There is someone close to me who encourages me to provide something other than breastmilk to my baby. | **1** | **2** | **3** | **4** | **5** |
| 24 | 外出先ではおっぱいをあげる場所に困る。  I have trouble finding places to breastfeed when I’m out and about. | **1** | **2** | **3** | **4** | **5** |
| 25 | 人工乳の製品情報によれば、人工乳を使うことには赤ちゃんの健康への利点もあるらしい。  According to product information regarding formula milk, giving formula milk has health benefits for babies. | **1** | **2** | **3** | **4** | **5** |
| 26 | あなたが休養をとれるように身近な人達が配慮してくれる。  There are people around you who help you get enough rest. | **1** | **2** | **3** | **4** | **5** |
| 27 | 家庭で快適におっぱいをあげられる。  I can breastfeed my baby comfortably at home. | **1** | **2** | **3** | **4** | **5** |
| 28 | 赤ちゃんを預けるときには、人工乳でないと預かる人が困ると思う。  When I leave my baby with other people, I think it will be problematic for them if my baby does not accept a bottle of formula milk. | **1** | **2** | **3** | **4** | **5** |
| 29 | 母乳育児すべきだというプレッシャーを感じる。  I feel pressured to breastfeed my baby. | **1** | **2** | **3** | **4** | **5** |
| 30 | 赤ちゃんのお世話をする上で助けになる区や市町村のサービスがある。  There are services from the city or other local government that help me take care of my baby. | **1** | **2** | **3** | **4** | **5** |
| 31 | 必要なときには、医師、助産師、保健師などの医療関係者に母乳育児のやり方を相談できる。  If necessary, I can consult with health care providers (doctors, public health nurses, midwives, etc.) on how to breastfeed. | **1** | **2** | **3** | **4** | **5** |

Possible responses: 1 = Does not apply to me, 2 = To some extent does not apply to me, 3 = Unsure (can’t say one or the other), 4 = Applies to me to some extent, 5 = Applies to me.

Items 6, 11, 12, 14, 15, 16, 18, 19, 20, 21, 22, 23, 24, 25, 28, and 29 were negatively worded. The scores on those items were reversed, such that higher scores indicate more support.

The English translation provided here is to be used not for collecting data, but rather for informational purposes only. It has not been tested in English for use among English-speaking mothers.
