# Supplementary material for: Development of the breastfeeding support scale to measure breastfeeding support from lay and professional persons, and its predictive validity in Japan
Source: PeerJ journal article supplement (doi:10.7717/peerj.11779), 2021-07-27
Supplement: Table_S4._CVI.docx [file Table_S4._CVI.docx]

Supplementary Table 4. Content Validity Index (CVI) of 31 items

| Item Number | Number of experts in agreementa | Item CVI |
| --- | --- | --- |
| 1 | 5 | 1.00 |
| 2 | 5 | 1.00 |
| 3 | 5 | 1.00 |
| 4 | 5 | 1.00 |
| 5 | 5 | 1.00 |
| 6 | 5 | 1.00 |
| 7 | 5 | 1.00 |
| 8 | 5 | 1.00 |
| 9 | 5 | 1.00 |
| 10 | 5 | 1.00 |
| 11 | 5 | 1.00 |
| 12 | 4 | 0.80 |
| 13 | 5 | 1.00 |
| 14 | 5 | 1.00 |
| 15 | 4 | 0.80 |
| 16 | 5 | 1.00 |
| 17 | 5 | 1.00 |
| 18 | 5 | 1.00 |
| 19 | 5 | 1.00 |
| 20 | 5 | 1.00 |
| 21 | 5 | 1.00 |
| 22 | 5 | 1.00 |
| 23 | 5 | 1.00 |
| 24 | 5 | 1.00 |
| 25 | 5 | 1.00 |
| 26 | 5 | 1.00 |
| 27 | 5 | 1.00 |
| 28 | 5 | 1.00 |
| 29 | 5 | 1.00 |
| 30 | 5 | 1.00 |
| 31 | 5 | 1.00 |

Scale level CVI by universal agreement method: 0.94

Average Item CVI: 0.99

a Number of experts who rated the item "3 = quite relevant” or “4 = highly relevant.” The panel included five experts.
